# Supplementary material
Source: ML conference proceedings conference paper supplement (https://proceedings.mlr.press/v70/malherbe17a.html)
Supplement: Supplementary file 1 [file malherbe17a-supp.zip]

Archive with 2 entries (2 files):
- Proofs.pdf
- XpsDetails.pdf
