# Supplementary material
Source: ML conference proceedings conference paper supplement (https://proceedings.mlr.press/v70/malherbe17a.html)
Supplement: Supplementary file 1 [file malherbe17a-supp.zip › XpsDetails.pdf]

## 1. Additional details for the experimental setup

The test functions of the benchmark are described in Table 1. Table 2 reports the the source of the implementations of the algorithms.

| Problem       | Objective function                                                                                                                                                                 | Domain                   | Local max. |
|---------------|------------------------------------------------------------------------------------------------------------------------------------------------------------------------------------|--------------------------|------------|
| Auto MPG      | $-\frac{1}{10} \sum_{k=1}^{10} \sum_{i \in D_k} (\hat{f}_k(X_i) - Y_i)^2$                                                                                                          | $[-2, 4] \times [-5, 5]$ | –          |
| Breast Cancer | where:<br>– $\hat{f}_k \in \underset{f \in \mathcal{H}_\sigma}{\operatorname{argmin}} \frac{1}{n- D_k } \sum_{i \notin D_k} (f(X_i) - Y_i)^2 + \lambda \ f\ _{\mathcal{H}_\sigma}$ | $[-2, 4] \times [-5, 5]$ | –          |
| Concrete      | – the data set $\{(X_i, Y_i)\}_{i=1}^n$ is split into 10 folds $D_1 \dots D_{10}$<br>– $\mathcal{H}_\sigma$ denotes the gaussian RKHS of bandwidth $\sigma$                        | $[-2, 4] \times [-5, 5]$ | –          |
| Yacht         | – $\ f\ _{\mathcal{H}_\sigma}$ is the corresponding norm                                                                                                                           | $[-2, 4] \times [-5, 5]$ | –          |
| Housing       | – $\sigma = 10^{x_1}$<br>– $\lambda = 10^{x_2}$                                                                                                                                    | $[-2, 4] \times [-5, 5]$ | –          |
| Holder Table  | $ \sin(x_1)  \times  \cos(x_2)  \times \exp( 1 - (x_1^2 + x_2^2)^{1/2}/\pi )$                                                                                                      | $[-10, 10]^2$            | 36         |
| Rosenbrock    | $-\sum_{i=1}^2 [100(x_{i+1} - x_i^2)^2 + (x_i - 1)^2]$                                                                                                                             | $[-2.048, 2.048]^3$      | –          |
| Sphere        | $-(\sum_{i=1}^4 (x_i - \pi/16)^2)^{1/2}$                                                                                                                                           | $[0, 1]^4$               | 1          |
| Linear Slope  | $\sum_{i=1}^4 10^{(i-1)/4} (x_i - 5)$                                                                                                                                              | $[-5, 5]^4$              | 1          |
| Deb N.1       | $\frac{1}{5} \sum_{i=1}^5 \sin^6(5\pi x_i)$                                                                                                                                        | $[-5, 5]^5$              | 36         |

Table 1. Description of the test functions of the benchmark. Dash symbols are used when a value could not be calculated.

| Library                                  | Algorithms        |
|------------------------------------------|-------------------|
| The CMA 1.1.06 package (Hansen, 2011)    | CMA-ES            |
| NLOpt Library (Johnson, 2014)            | CRS, DIRECT, MLSL |
| BayesOpt Library (Martinez-Cantin, 2014) | BayesOpt          |

Table 2. Source of the implementations of the algorithms used for comparison.

## References

- Hansen, Nikolaus. The cma evolution strategy: A tutorial. Retrieved May 15, 2016, from <http://www.lri.fr/hansen/cmaesintro.html>, 2011.
- Johnson, Steven G. The NLOpt nonlinear-optimization package. Retrieved May 15, 2016, from <http://ab-initio.mit.edu/nlopt>, 2014.
- Martinez-Cantin, Ruben. Bayesopt: A bayesian optimization library for nonlinear optimization, experimental design and bandits. *The Journal of Machine Learning Research*, 15(1):3735–3739, 2014.
